# Supplementary material for: An efficient “off–on” carbon nanoparticle-based fluorescent sensor for recognition of chromium(vi) and ascorbic acid based on the inner filter effect
Source: Royal Society of Chemistry journal article supplement (doi:10.1039/c7tb00017k), 2017-01-01
Supplement: c7tb00017k1.pdf [file c7tb00017k1.pdf]

## Supporting Information

### **An efficient “off–on” carbon nanoparticle-based fluorescent sensor for recognition of chromium(VI) and ascorbic acid based on inner filter effect**

Pingjing Li<sup>2</sup>, Yayu Hong<sup>1</sup>, Huatao Feng<sup>1</sup>, Sam F.Y. Li<sup>1,2\*</sup>

<sup>1</sup>Chemistry department, National University of Singapore, Science Drive 3, S117543

<sup>2</sup>NUS Environmental Research Institute, National University of Singapore, T-Lab Building, 5A Engineering Drive 1, Singapore 117411

---

\* Corresponding author, Tel: (65)-6516-2681; Fax: (65)-6779-1691; email: [chmlifys@nus.edu.sg](mailto:chmlifys@nus.edu.sg)

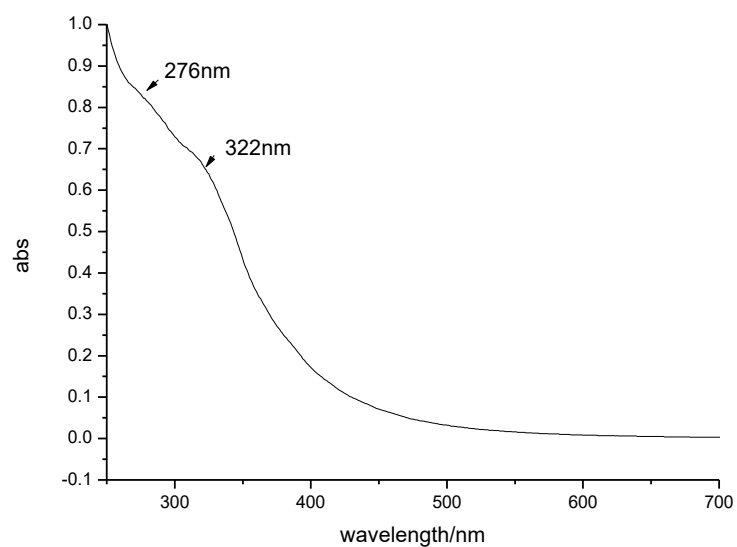

**Fig S1.** UV-vis absorption spectra (abs) of CDs.

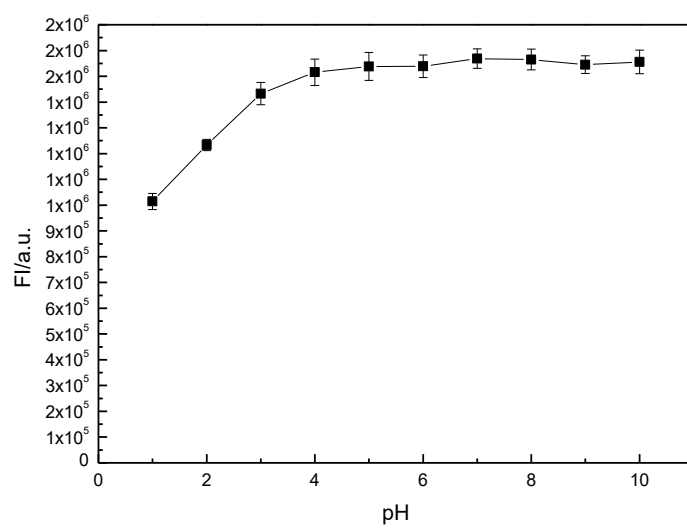

**Fig S2.** pH effect of N-CNPs.

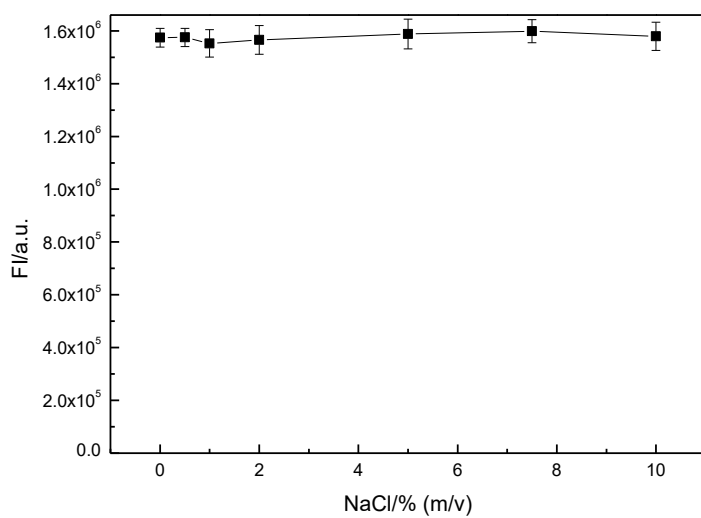

**Fig. S3** Effect of ionic strength on the fluorescence intensity of N-CNPs.

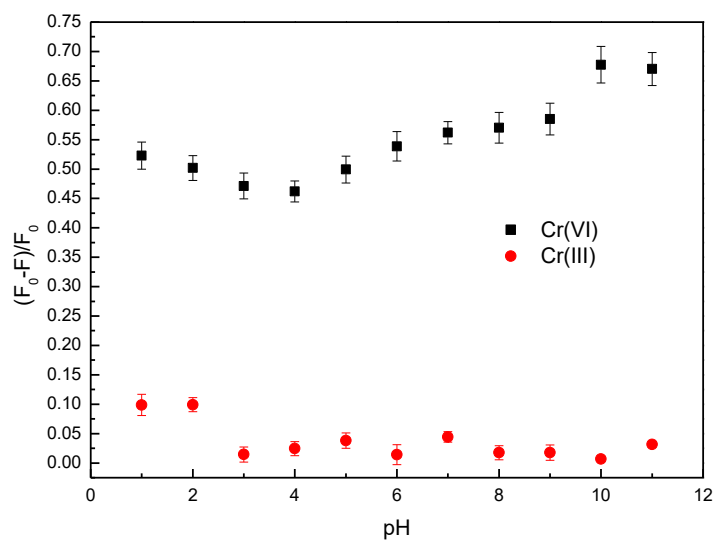

**Fig S4.** pH effect on quenching efficiency of N-CDs by Cr(VI). Cr(VI) concentration: 80  $\mu\text{mol/L}$ ; response time: 5 min.

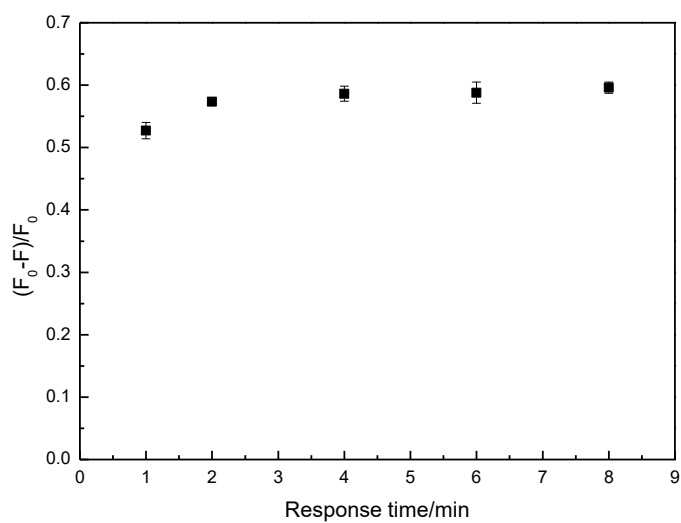

**Fig. S5.** Response time on quenching efficiency of N-CDs by Cr(VI). Cr(VI) concentration: 80  $\mu\text{mol/L}$ ; pH 7.0.

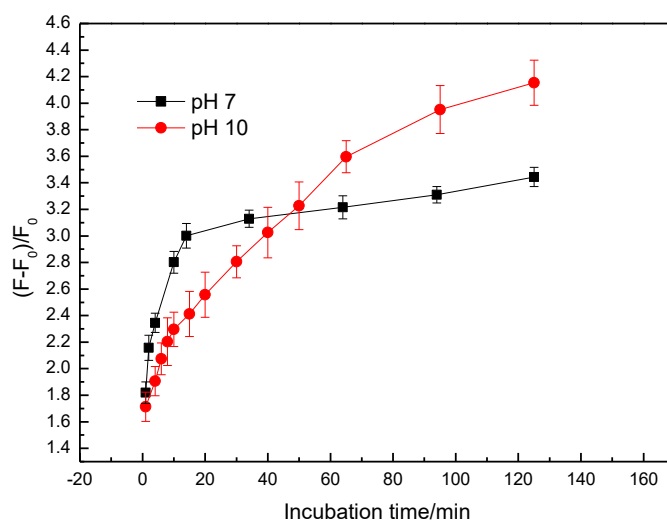

**Fig. S6.** Incubation time on recovery efficiency of N-CDs by Cr(VI) at pH 7 and pH 10.0. Cr(VI) concentration: 200  $\mu\text{mol/L}$ .

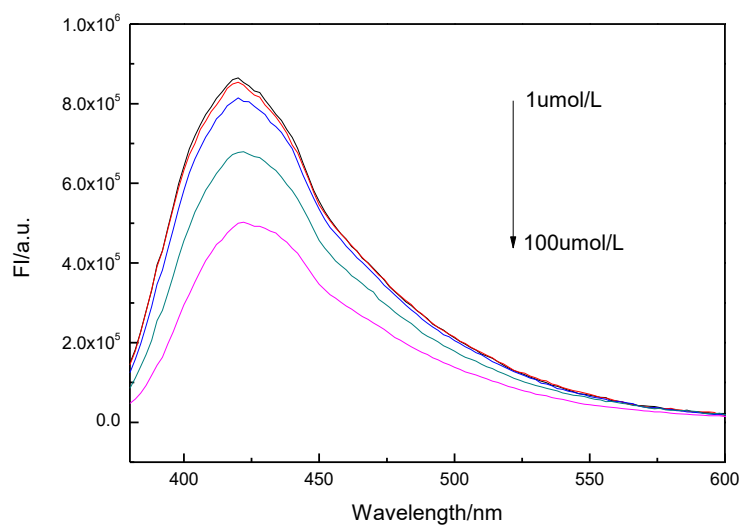

(A)

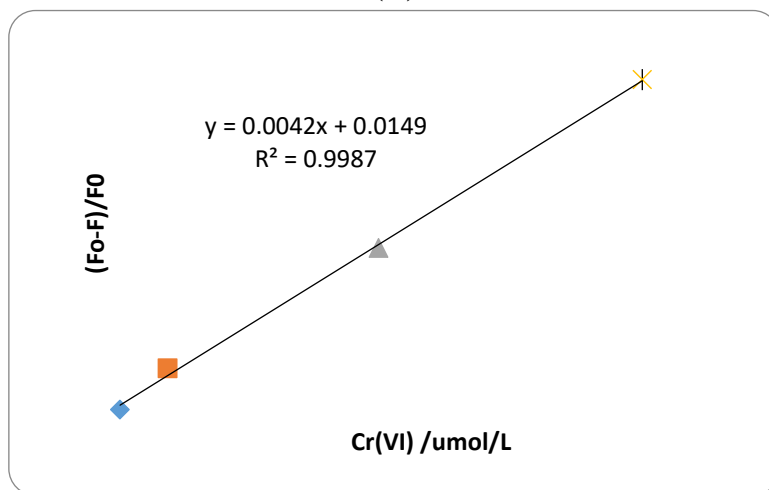

(B)

**Fig. S7.** (A) Fluorescence spectra of N-CDs dispersion in the presence of different concentrations of Cr(VI) (from top to bottom: 1-100  $\mu\text{mol/L}$ ) in reservoir water. (B) Dependence of  $(F_0-F)/F_0$  on the concentrations of Cr(VI) within the range of 1-100  $\mu\text{mol/L}$ . ( $F_0$  and  $F$  are the fluorescence intensities of N-CDs aqueous solution at 420 nm in the absence and presence of Cr(VI)).

**Table S1.** Quantum yield (QY) calculation of the CDs at 370 nm

| Sample          | Integrated fluorescence intensity(F) | UV Absorbance | Quantum yield ( $\Phi$ ) |
|-----------------|--------------------------------------|---------------|--------------------------|
| Quinine sulfate | 7566666                              | 0.069         | 0.54                     |
| CDs             | 3158158                              | 0.029         | 0.537                    |

**Table S2** Determination of Cr(VI) in water samples and AA in healthy human serum samples.

| Sample          | Cr(VI) / $\mu\text{mol/L}$ | RSD/% (n=3) | Sample  | AA / $\mu\text{mol/L}$ | RSD/% (n=3) |
|-----------------|----------------------------|-------------|---------|------------------------|-------------|
| Reservoir water | N.D.                       | 2.45        | Serum 1 | 1.23 $\pm$ 0.03        | 3.24        |
| Tap water       | N.D.                       | 3.64        | Serum 2 | 0.87 $\pm$ 0.12        | 3.11        |
| Rain water      | N.D.                       | 2.15        | Serum 3 | 1.92 $\pm$ 0.14        | 4.12        |
